# Supplementary material for: First insight into the artistic materials of Willi Baumeister´s paintings using non- destructive multianalytical methods
Source: Research Square preprint supplement (doi:10.21203/rs.3.rs-7347608/v1), 2025-09-08
Supplement: Supplementary file 1 [file 9d1e0939b5a43eb1de7a73b4.docx]

**First insight into the artistic materials of Willi Baumeister´s paintings using non-destructive multianalytical methods**

Eva Mariasole Angelin1, Simon Mindermann1, Roland Lenz2, Wibke Neugebauer2, Clarimma Sessa1*

1 Chair for Conservation-Restoration, Art Technology and Conservation Science, Technical University of Munich, Oettingenstraße, 15, 80538 Munich, Germany, clarimma.sessa@tum.de

2 Staatliche Akademie der Bildenden Künste, Am Weißenhof 1, Stuttgart, Germany

**Supplementary material**

Table S1. List of organic materials used for comparison in the interpretation of ER-FTIR.

| **Product type** | **Trade name** | **Supplier company** | **Category** |
| --- | --- | --- | --- |
| Animal Skin Glue | Rabbit-Skin glue | Kremer Pigmente #63025 | Natural |
| Gum Arabic | Gum Arabic concentrated | Schmincke #50 302 | Natural |
| Mastic Gum | Mastic from Chios, Greece, best quality | Kremer Pigmente #60050 | Natural |
| Buttermilk | Milbona Reine  Buttermilch  (max. 1% Fett) | Hohenloher Molkerei eG | Natural |
| Linseed oil | Kremer Linseed Oil Varnish | Kremer Pigmente #73100 | Natural |
| Cellulose Lacquer | Zapon Lacquer | Kremer Pigmente #79550 & 79570 | Semi-synthetic |
| Acrylate Resin | ParaloidTM B72 | Kremer Pigmente #67400-67409 | Synthetic |
| Alkyd Resin | Alkyd Resin AM | Kremer Pigmente #79163 | Synthetic |
| Ketone Resin | Laropal® K-80 | BASF | Synthetic |
| PVA-Dispersion | Mowilith D50 | Celanese | Synthetic |
| PVA | Raviflex BL 5S - A | Vinavil | Synthetic |

Table S2. List of the multi-band images with their nomenclature, technical features (illumination and acquisition) and acronym used through the paper.

| Nomenclature | Detection spectral range | Camera filters | **R**eflectance / **L**uminescence | Light source induction | Emission spectral range of the light source | Light source | Illumination source filter | Acronym* |
| --- | --- | --- | --- | --- | --- | --- | --- | --- |
| Vis-reflected images | VIS | Schott BG38 with Baader UV /IR-Cut L | R | VIS | 380 nm – 750 nm | Halogen lamps 1000W | --- | VIS-R_vis |
| Vis-induced IR luminescence | IR | Schott RG830 | L | VIS | 380 nm – 750 nm | LED | Schott BG38 | IR-L_vis |
| UV-induced IR luminescence | IR | Schott RG830 | L | UV | 365 nm (max) | UV LED from Dr. Hönle AG | Schott MUG2 | IR-L_uv |
| UV-induced Vis luminescence | VIS | Schott BG38 with Baader UV /IR-Cut L | L | UV | 365 nm (max) | UV LED from Dr. Hönle AG | Schott MUG2 | VIS-L_uv |
| IR False Color |  |  |  |  |  |  |  | IRFC |
| UV False Color |  |  |  |  |  |  |  | UVFC |
| *The acronym was developed by Annette T. Keller and Roland Lenz and is discussed in Keller, A. T., et al. Exploring the Ultraviolet Induced Infrared Luminescence of Titanium White Pigments. In: Fuster López L, Stols-Witlox M, Picollo M, editors. UV-Vis Lumi-nescence imaging techniques/ Técnicas de imagen de luminiscencia UV-Vis: Editorial Universitat Politècnica de València; 2019. p. 201–232. Basically, the spectrum captured with the camera is indicated with capital letters (UV, VIS, IR), after the hyphen the type of recording method in capital letters (R for reflection, L for luminescence) and after the underscore in lower case letters the spectral range of the radiation source. | | | | | | | | |

| 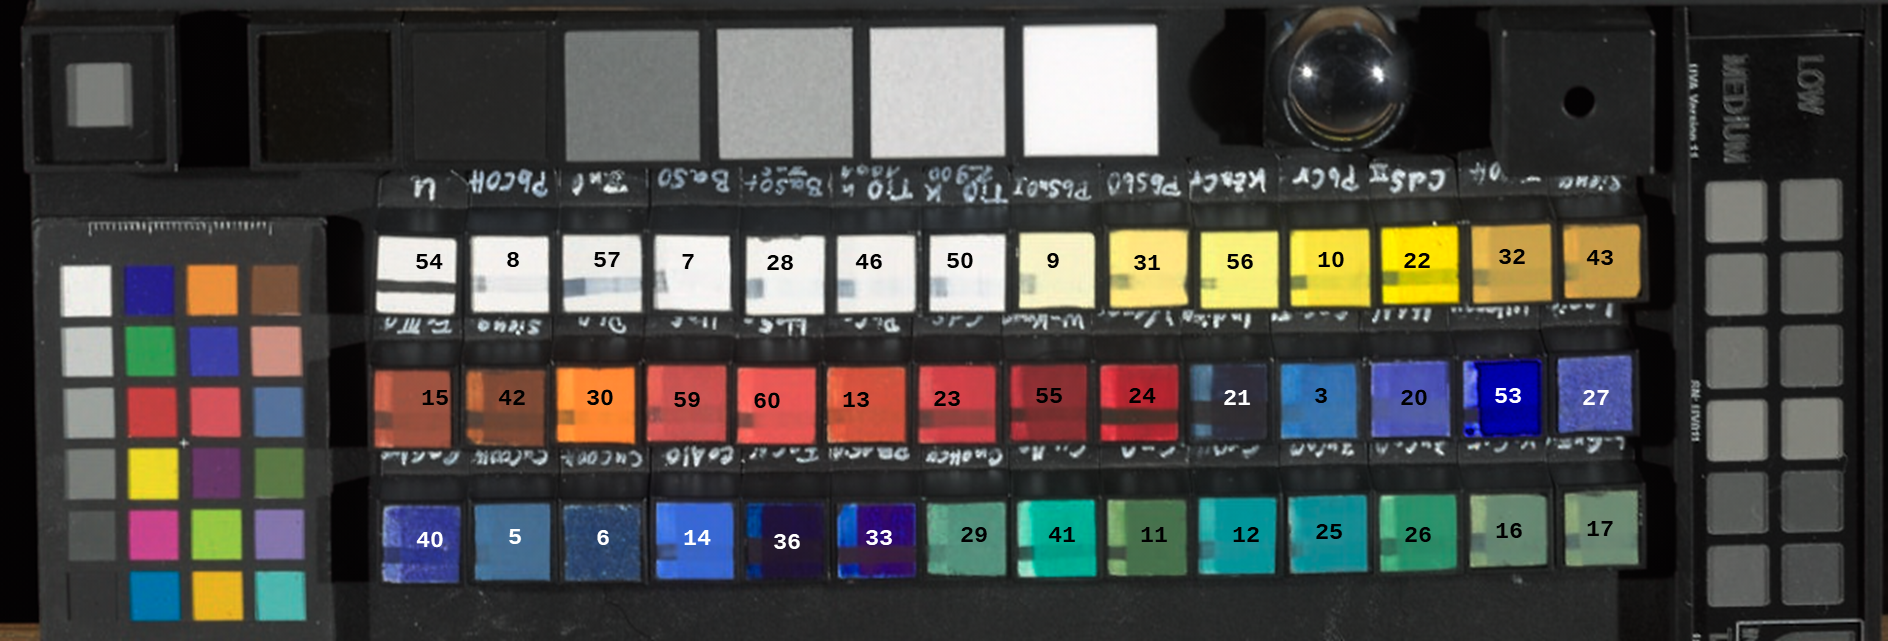 |
| --- |
| Figure S1. Calibration targets and pigment targets used for the multi-band technical imaging. List of the pigments is reported in Table S3. |

Table S3. List of pigments used to prepare the pigment targets for the multi-band technical imaging. The origin or manufacturer are also listed for each pigment.

| **Number** | **Name** | **Provenance** |
| --- | --- | --- |
| 54 | Primer made of calcium carbonate without pigment coating, black line of iron oxide black | Calcium carbonate from Kremer Pigmente |
| 8 | Lead White | Collection Lenz (old painters' stock) |
| 57 | Zinc White | Kremer Pigmente #46300 |
| 7 | Barium sulfate (natural) | Kremer Pigmente #58700 |
| 28 | Lithopone | Kremer Pigmente #46100 |
| 46 | Titanium White (Anatase) | Kronos #1001 |
| 50 | Titanium White (Rutile) | Kronos #2900 |
| 9 | Lead-Tin Yellow | Collection Lenz, probably Kremer |
| 31 | Naples yellow | Collection ABK Stuttgart/Esslingen (old painters' stock) |
| 56 | Zinc Yellow | Collection Lenz (dated around 1928) |
| 10 | Chrome yellow | Collection Lenz (dated around 1928) |
| 22 | Cadmium Yellow | Kremer Pigmente #21040 |
| 32 | Ochre | Deffner & Johann #1011000, Collection ABK Stuttgart/Esslingen |
| 43 | Sienna natural | Kremer Pigmente #17050 |
| 15 | Red Iron Oxide | Collection Lenz, Kremer Pigmente (around 1992) |
| 42 | Burnt Sienna | Kremer Pigmente #40430 |
| 30 | Red Lead | Kremer Pigmente #42500 |
| 59 | Cinnabar (natural) | Kremer Pigmente #10620 |
| 60 | Cinnabar (synthetic) | Collection Lenz (Atelier Ingenhoff) |
| 13 | Chrome Red | Collection ABK Stuttgart/Esslingen, #307 |
| 23 | Cadmium Red | Kremer Pigmente #21130 |
| 55 | Madder Lake | Collection ABK Stuttgart/Esslingen |
| 24 | Madder Lake (Krapplack) | Collection Lenz (Atelier Ingenhoff) |
| 21 | Indigo | Sammlung Halle Esslingen, Aufschrift "Indigo echt" von Helmut Reichwald |
| 3 | Egyptian Blue | Kremer Pigmente #10060 |
| 20 | HAN-Blue | Kremer Pigmente # 10072 |
| 53 | Ultramarine Blue | Collection ABK Stuttgart/Esslingen |
| 27 | Lapislazuli | Afghanistan lapis lazuli |
| 40 | Smalt | Kremer Pigmente #10000 |
| 5 | Azurite | Kremer Pigmente #1021 |
| 6 | Azurite | Collection ABK Stuttgart / Esslingen,in-house production, coarsest grain size |
| 14 | Cobalt blue | Cobalt blue #2R, former Bayer production, Kremer (special item) |
| 36 | Prussianblue | Collection Lenz, (Aterlier Ingenhoff) |
| 33 | Phthalocyanine Blue | Kremer Pigments #23050 |
| 29 | Malachite | Kremer Pigmente #10300 |
| 41 | Verdigris | Collection Lenz |
| 11 | Chrome Green | Collection ABK Stuttgart/Esslingen |
| 12 | Chrome oxide hydrate green | Collection ABK Stuttgart/Esslingen |
| 25 | Cobalt green II | Kremer Pigmente # 44151 |
| 26 | Cobalt green I | Collection Lenz, Schminke |
| 16 | Veronese Green Earth | Collection ABK Stuttgart/Esslingen |
| 17 | Bohemian Green Earth | Kremer Pigmente # 40810 |

Table S4 – List of the identified elements per each color observed in fragment V_005. One representative spot measurement was selected per color. Elements are listed in order of relative abundance, from left (most abundant) to right (least abundant). Elements likely responsible for the visible color are highlighted in bold.

| **Color** | **Point of analysis** | **Identified elements** |
| --- | --- | --- |
| Red | R21 | Zn, Ba, Ti(?), **Se**, Fe, **Cd**, Pb, Ca, S?, **Hg(tr)** |
| Red | R3 | Zn, Ba, Ti(?), Ca, Fe, Pb, **Se**, **Cd**, S? |
| Blue | B1 | Zn, Ba, Ti(?), Fe, Ca, Pb, S? |
| Grey | Gy19 | Zn, Ti, Ba, Fe, Ca, Pb, S?, K |
| Black | Bk16 | Zn, Ti, Ba, Ca, Fe, **Mn**, Pb, S? |
| Brown | Br4 | Zn, Ba, Ti, **Fe**, Ca, Pb, **Mn**, S?, K |
| Yellow | Y18 | Zn, Ba, Ti, Ca, **Fe**, Pb, S?, K |
| White | W6 | Zn, Ba, **Ti**, Ca, Pb, Fe, S? |
| Background | Bkg17 | Zn, Ca, **Pb**, Ti, Ba, Fe, S? |

| 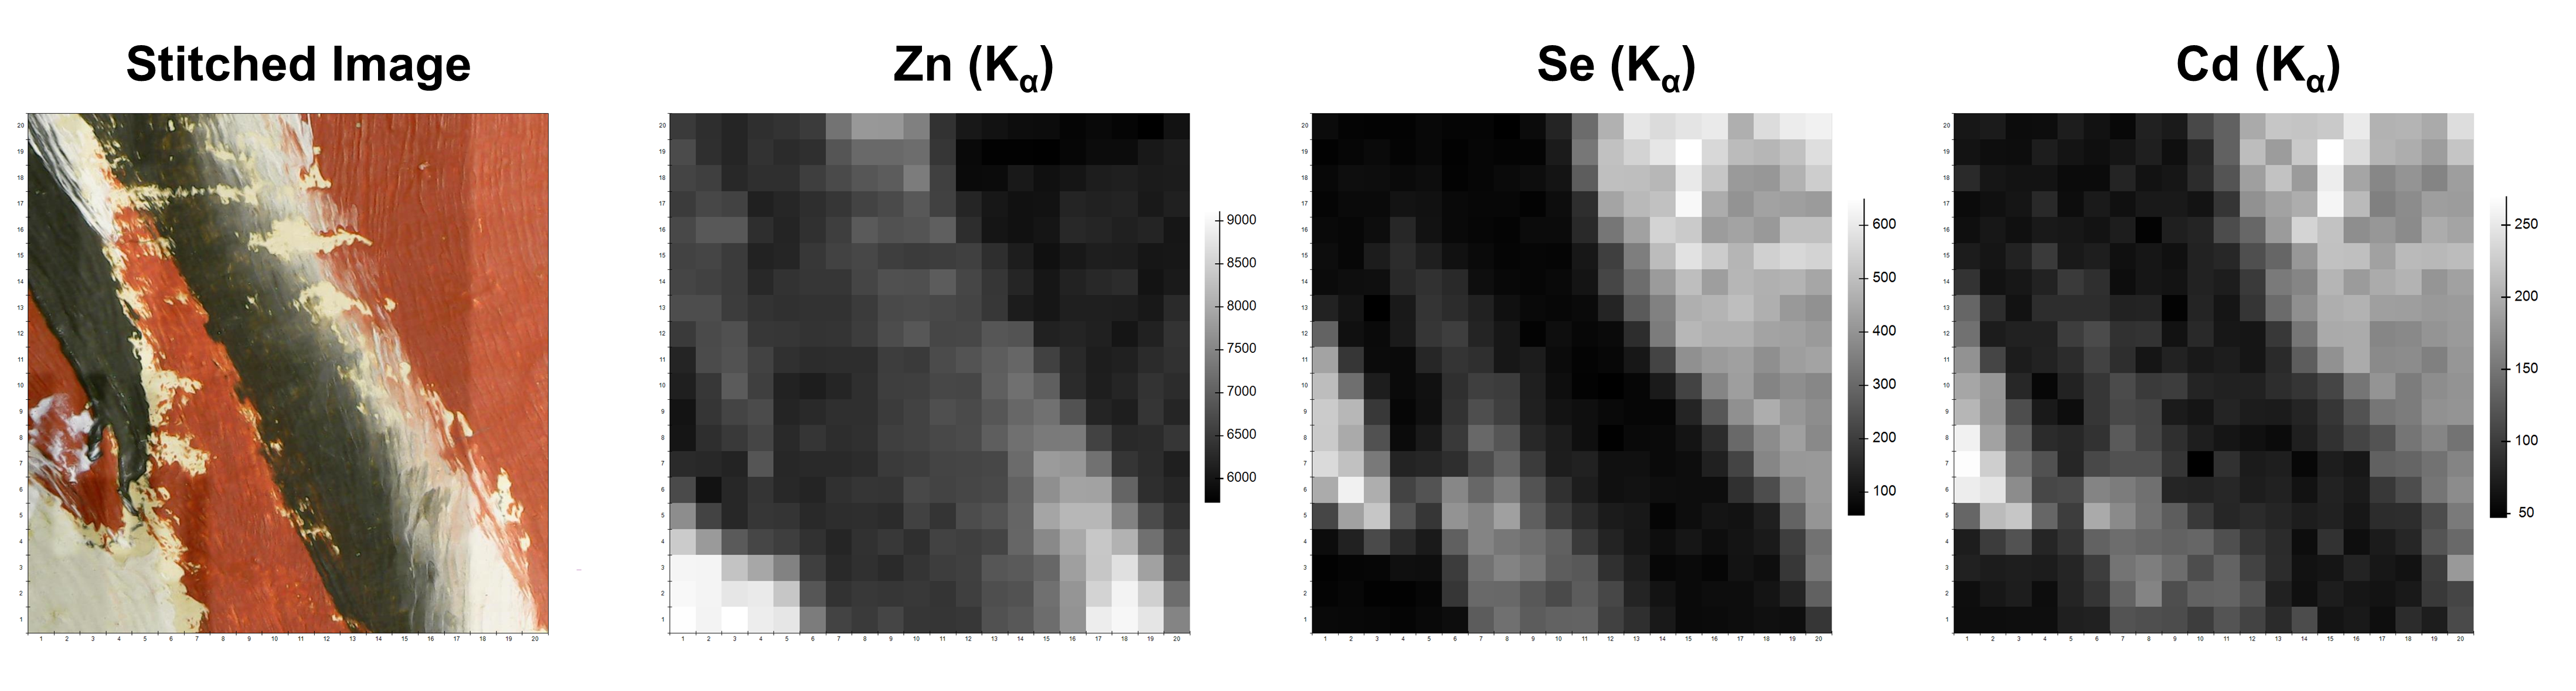 |
| --- |
| Figure S2. Results of the elemental distribution for map4 of V_005 Fragment. From left to right: stitched image and distribution of selected elements considering one X-ray line. The scale of intensity per each elemental distribution is independent and considers the maximum and minimum counts collected for the X-ray line considered. Only elements relevant to the discussion are displayed. |

Table S5 – List of the identified elements per each color observed in fragment V_006. One representative spot measurement was selected per color. Elements are listed in order of relative abundance, from left (most abundant) to right (least abundant). Elements likely responsible for the visible color are highlighted in bold.

| **Color** | **Point of analysis** | **Identified elements** |
| --- | --- | --- |
| Black | Bk5 | Ca, Zn, Ba, Ti?, Fe, Pb, Se, Cd?, S? |
| Orange | O6 | Ca, Zn, Ba, Ti?, **Fe**, Pb, **Se**, **Cd**, S? |
| Orange | O3 | Ca, Zn, Ba, Ti?, **Fe(+)**, Pb, Se, Cd(tr), S? |
| White | W1 | Ca, **Ti**, Ba, **Zn**, Fe, Pb, Se, Cd?, S? |

| 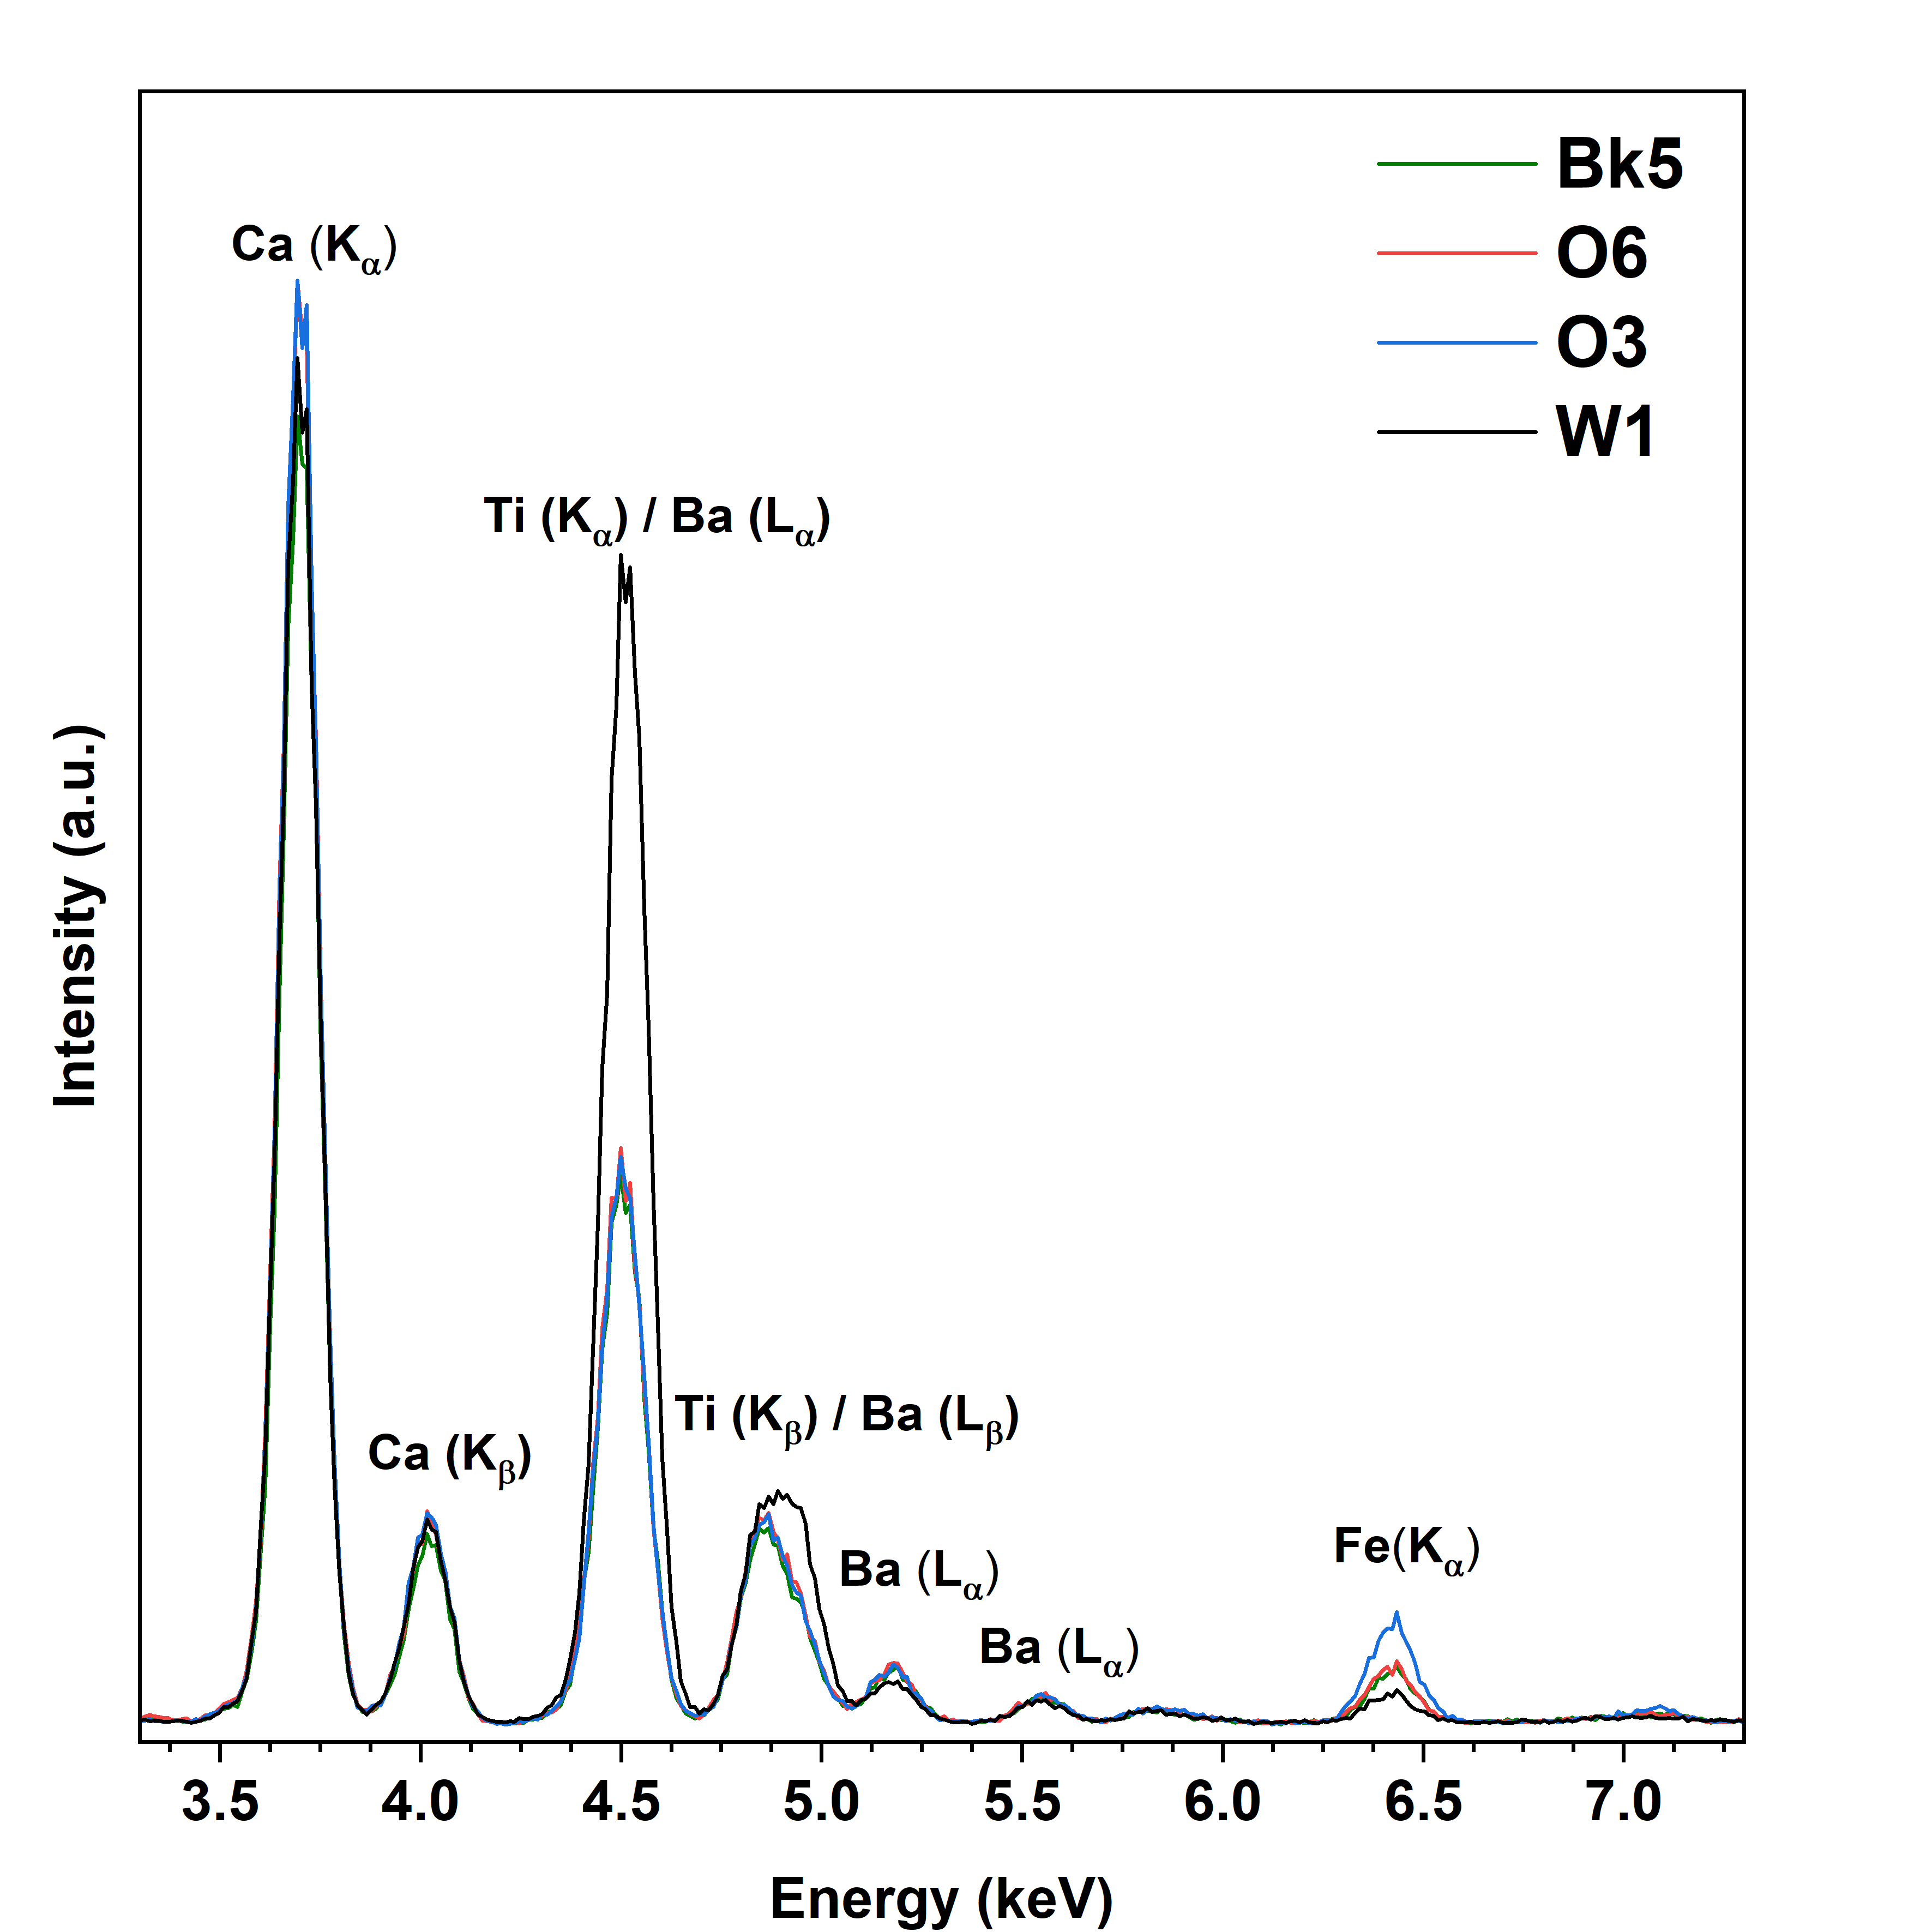 |
| --- |
| Figure S3. XRF spectra of a selection of spot analysis of the fragment V_006. Location of the spot analysis see Figure 4a. |

| 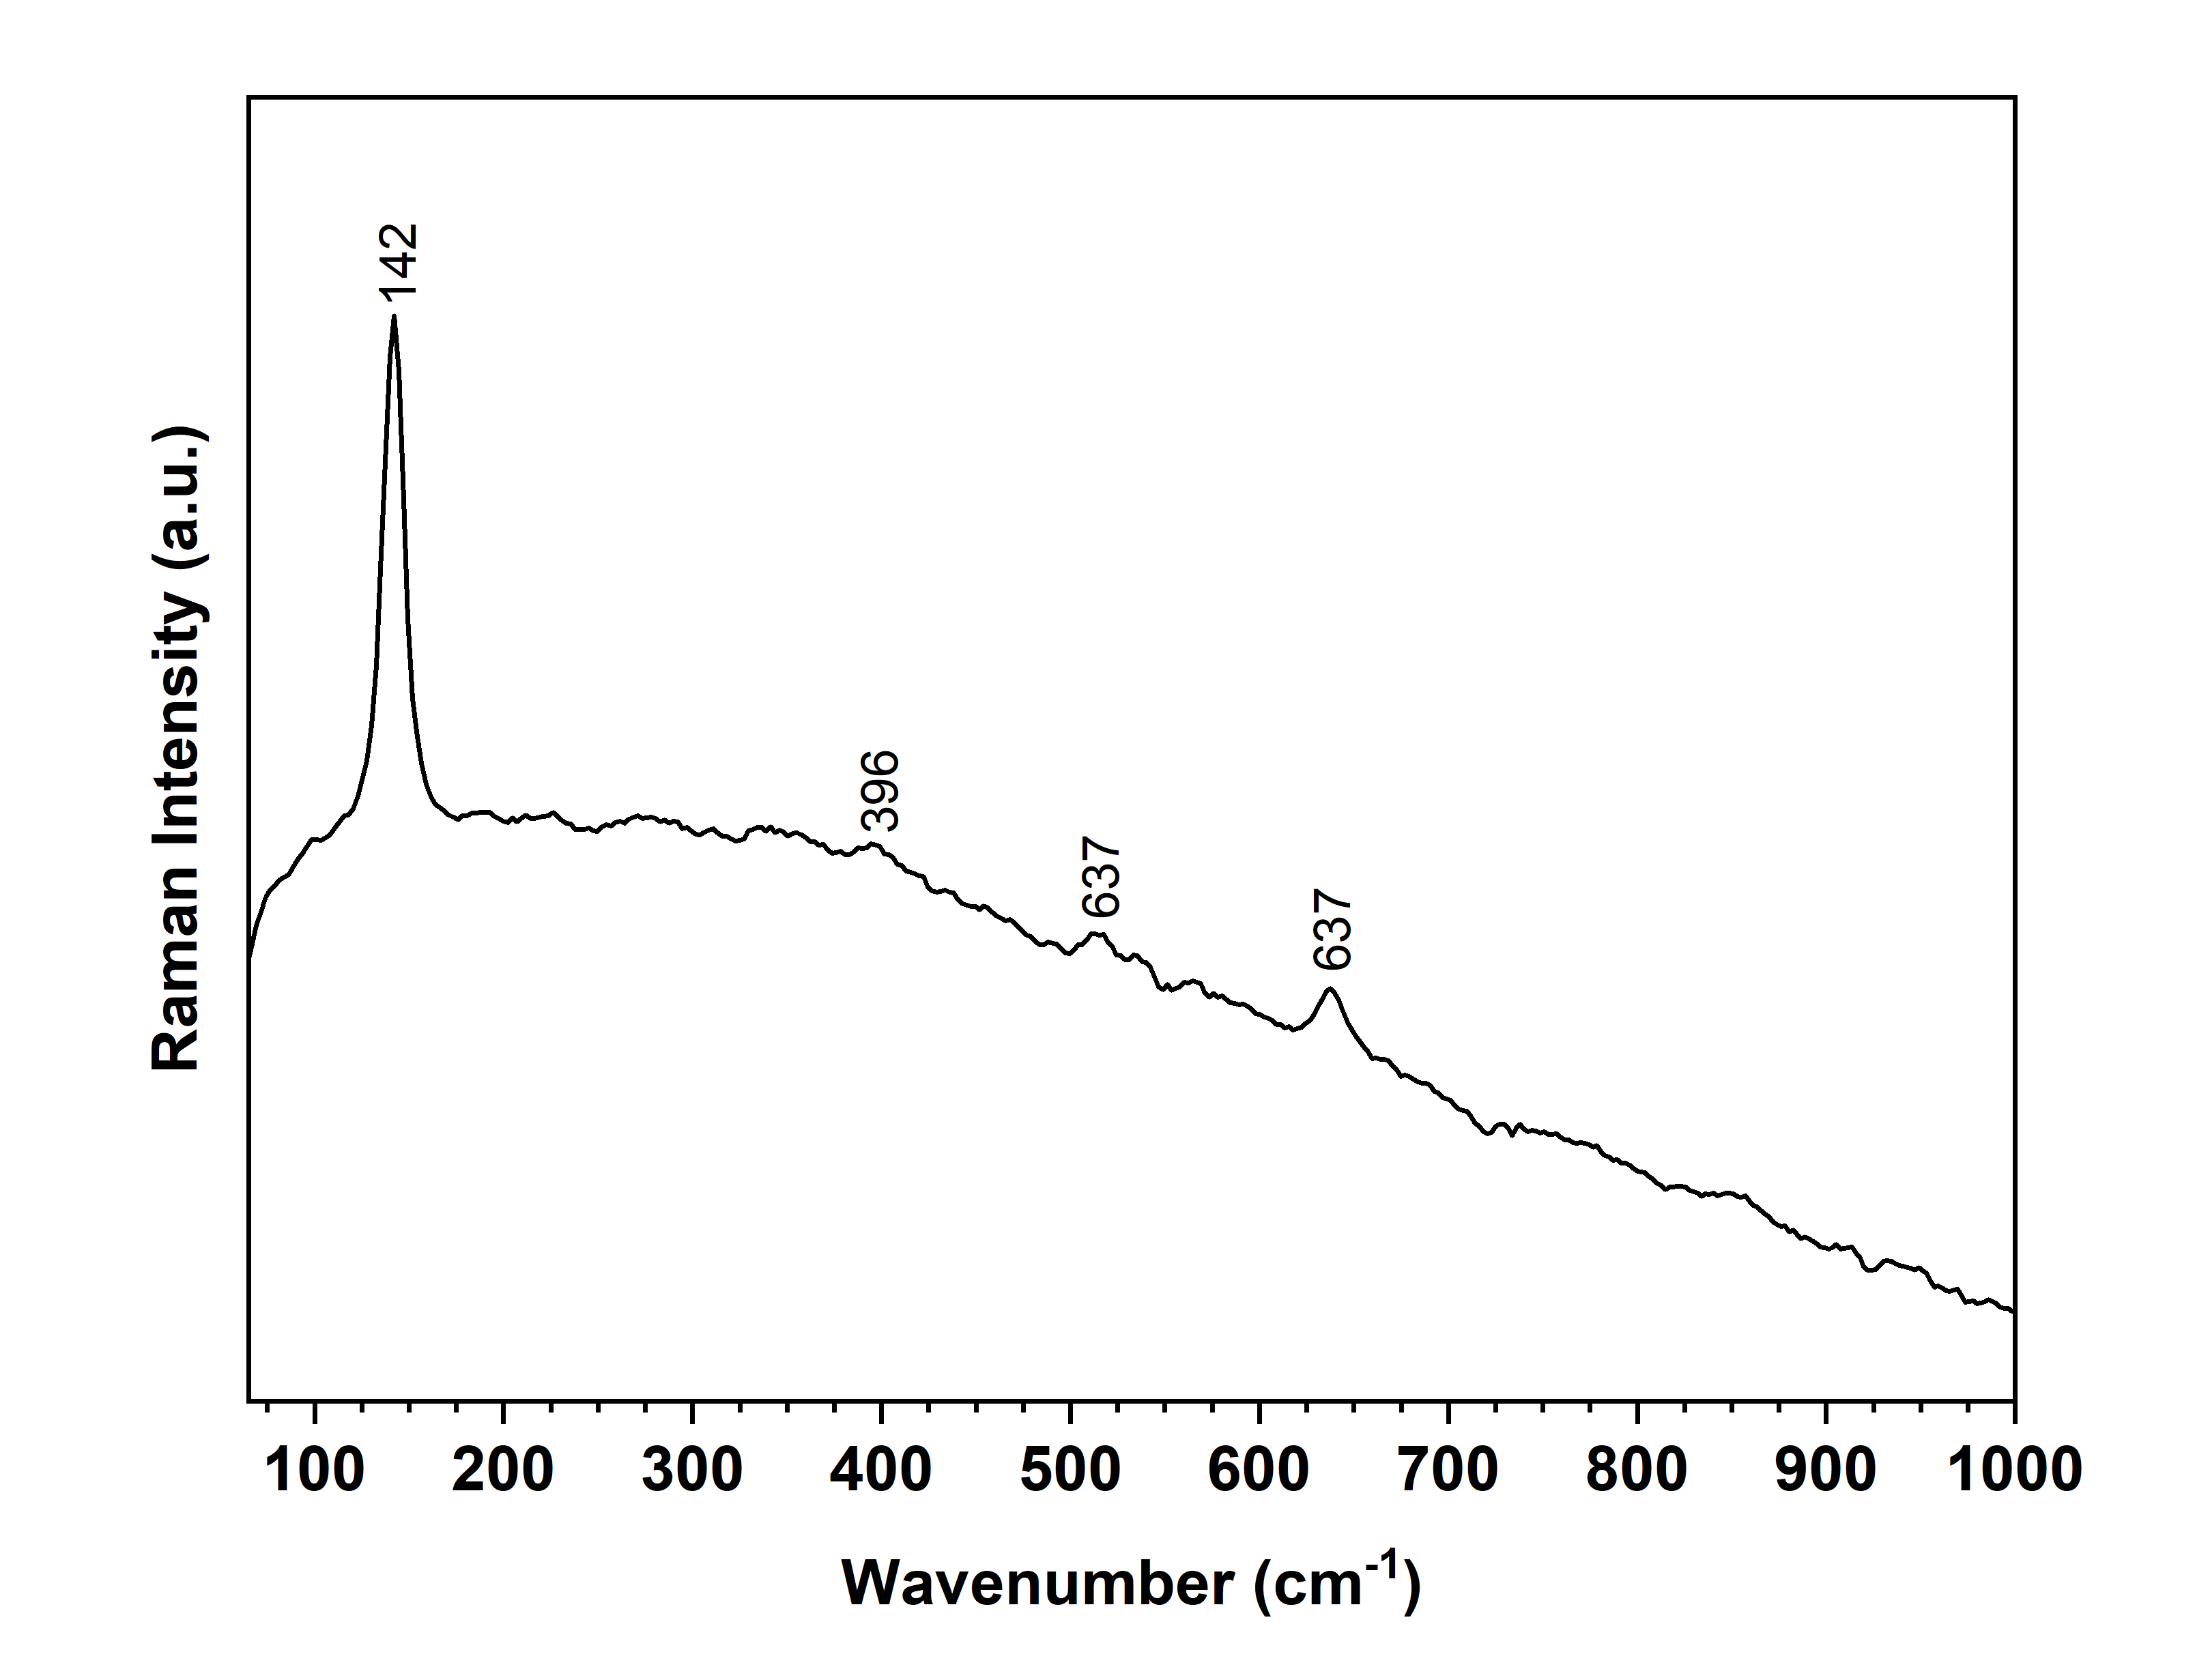 |
| --- |
| Figure S4. Raman in W1 of fragment V_006. Location of the spot analysis see Figure 4a. |

| 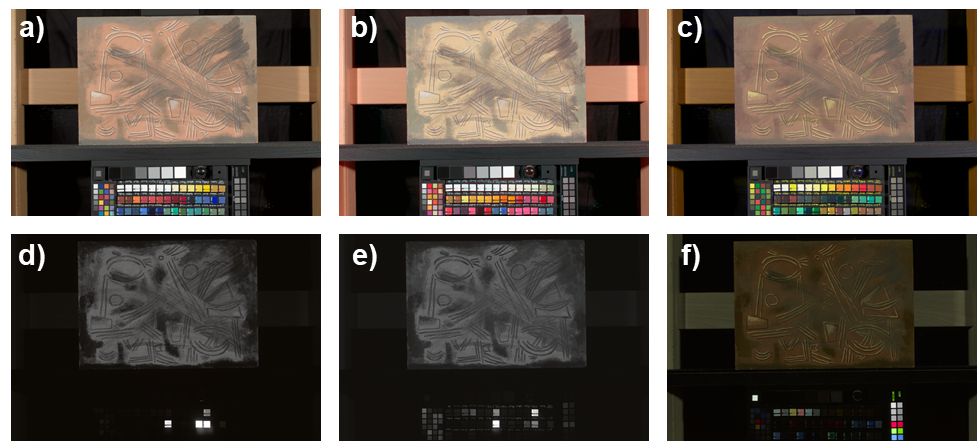 |
| --- |
| Figure S5. Multiband imaging set of fragment V_006. The pigment targets are placed in the bottom part of the image for comparison. a) VIS-R_vis, b) IRFC; c) UVFC, d) IR-L_vis, e) IR-L_uv, f) VIS-L_uv. Spectrally relevant for the discussion was observed for titanium dioxide (anatase) (n. 46) in (c), cadmium yellow (n. 22) and cadmium red (n. 23) in (d,e,f). In VIS-L_uv (f), zinc white (n. 57) is the unique white pigment presenting a yellow luminescence. |

| 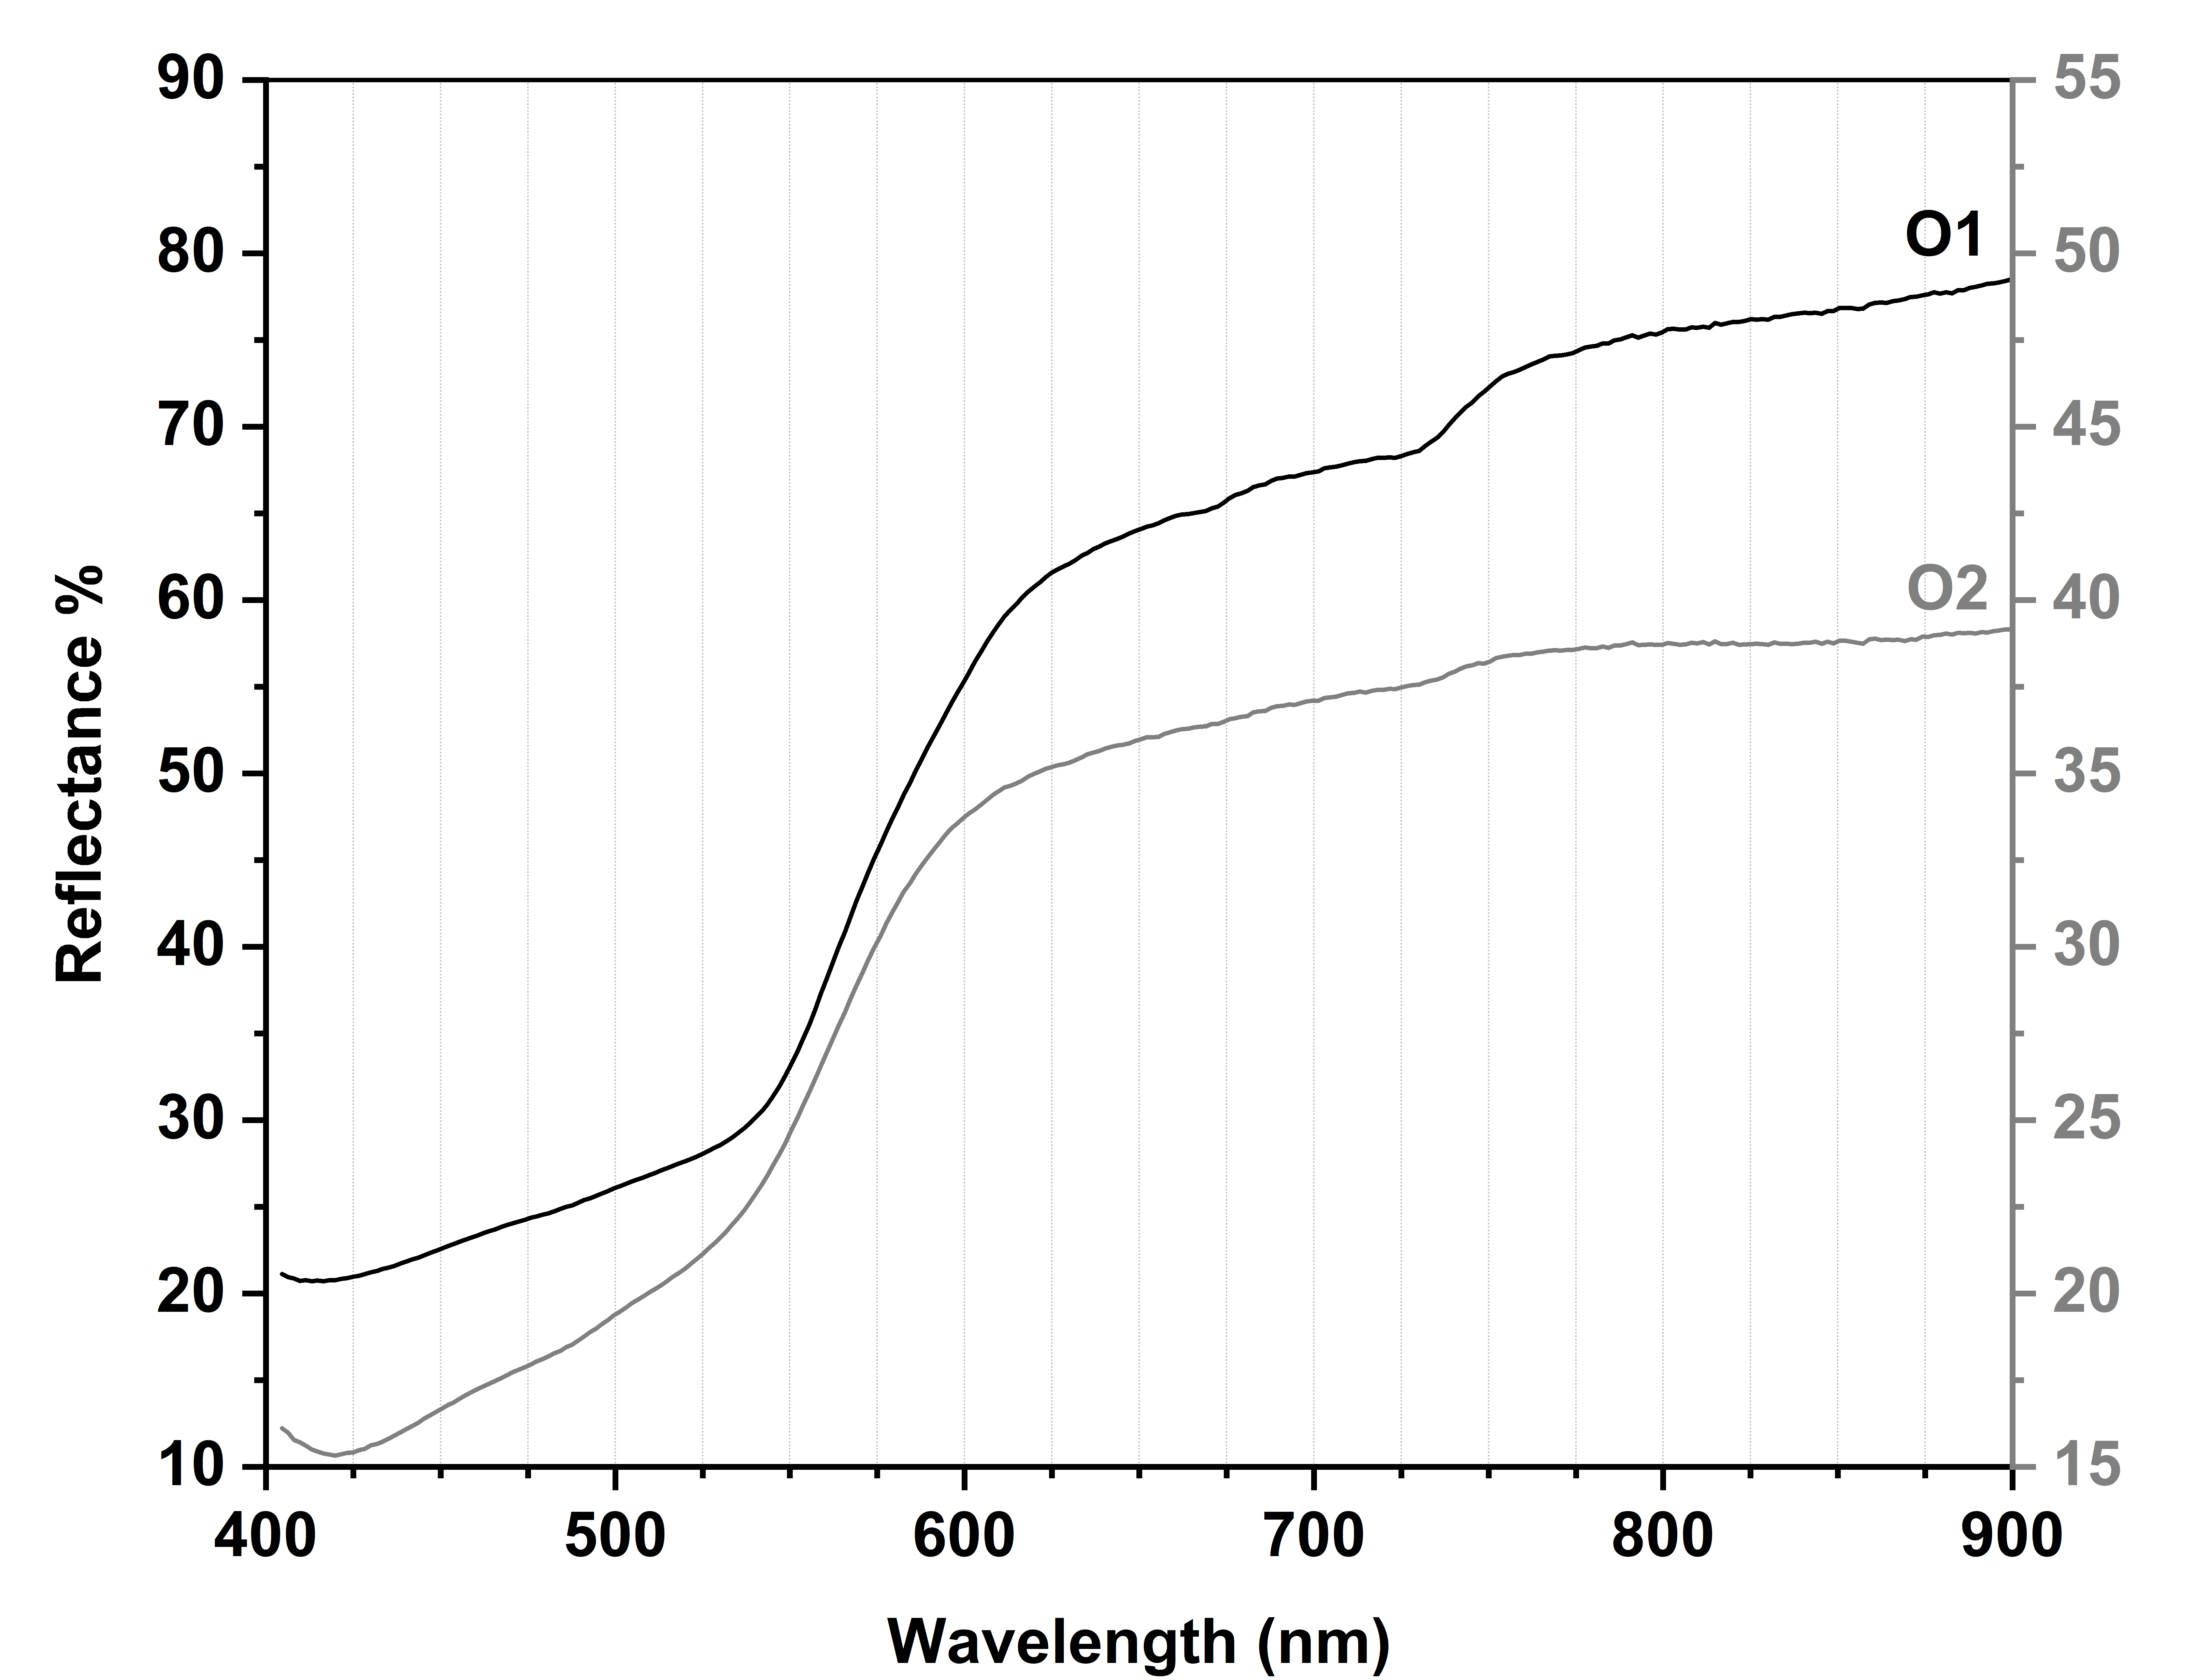 |
| --- |
| Figure S6. Reflectance spectra extracted from the image-cube acquired for fragment V_006 at the areas reported in Figure 4a. |

|  |
| --- |
|  |

|  |
| --- |
| Figure S7. VIS-R_vis details of the fragment V_013 displaying the cracking of the black paint and revealing underneath colors. |

| 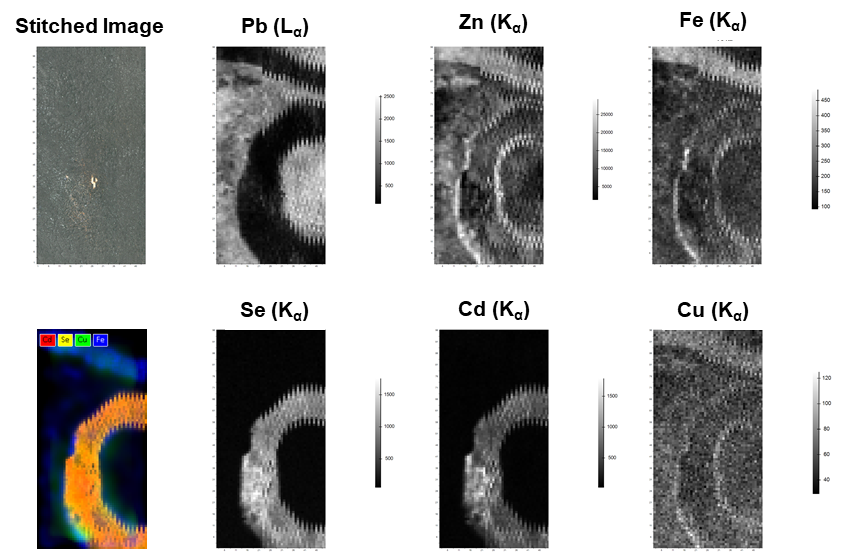 |
| --- |
| Figure S8. Results of the elemental distribution for map2 of V_013 Fragment (see Figure S11). From left to right: stitched image and distribution of selected elements considering one X-ray line. The scale of intensity per each elemental distribution is independent and considers the maximum and minimum counts collected for the X-ray line considered. Only elements relevant to the discussion are displayed. For the location of the mapping, see Figure 5a. |
| 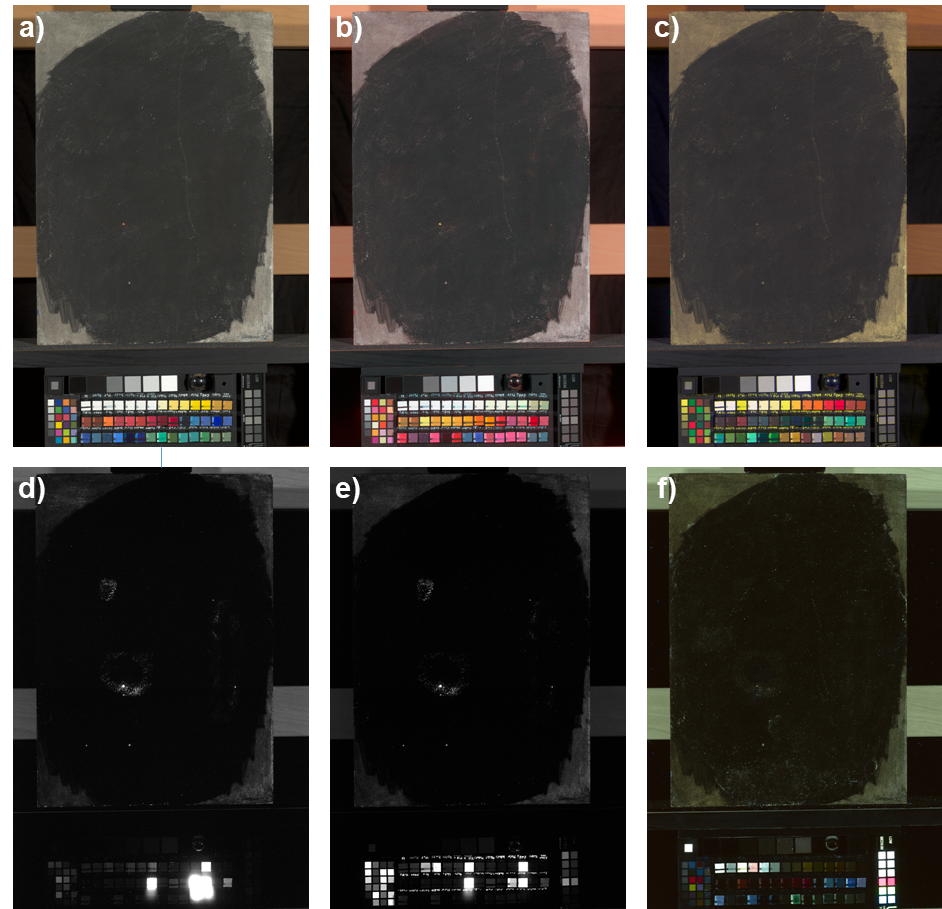 |
| Figure S9. Multiband imaging set of fragment V_005. The pigment targets are placed in the bottom part of the image for comparison. a) VIS-R_vis, b) IRFC; c) UVFC, d) IR-L_vis, e) IR-L_uv, f) VIS-L_uv. Luminescence relevant for the discussion was observed for cadmium yellow (n. 22) and cadmium red (n. 23) in (d) and (e). |
|  |
|  |
